# Supplementary material for: The Ontogeny of Bumblebee Flight Trajectories: From Naïve Explorers to Experienced Foragers
Source: PubMed Central journal article supplement (PMC3827042; doi:10.1371/journal.pone.0078681), 2013-11-12
Supplement: pone.0078681.s001.pdf [file pone.0078681.s001.pdf]

**Supporting Information: Figure S1:** Diagrammatic map of the landscape used for tracking bumblebee flights. Temperature, wind speed and direction were recorded at 1.9 m above the ground at the five meteorological stations.

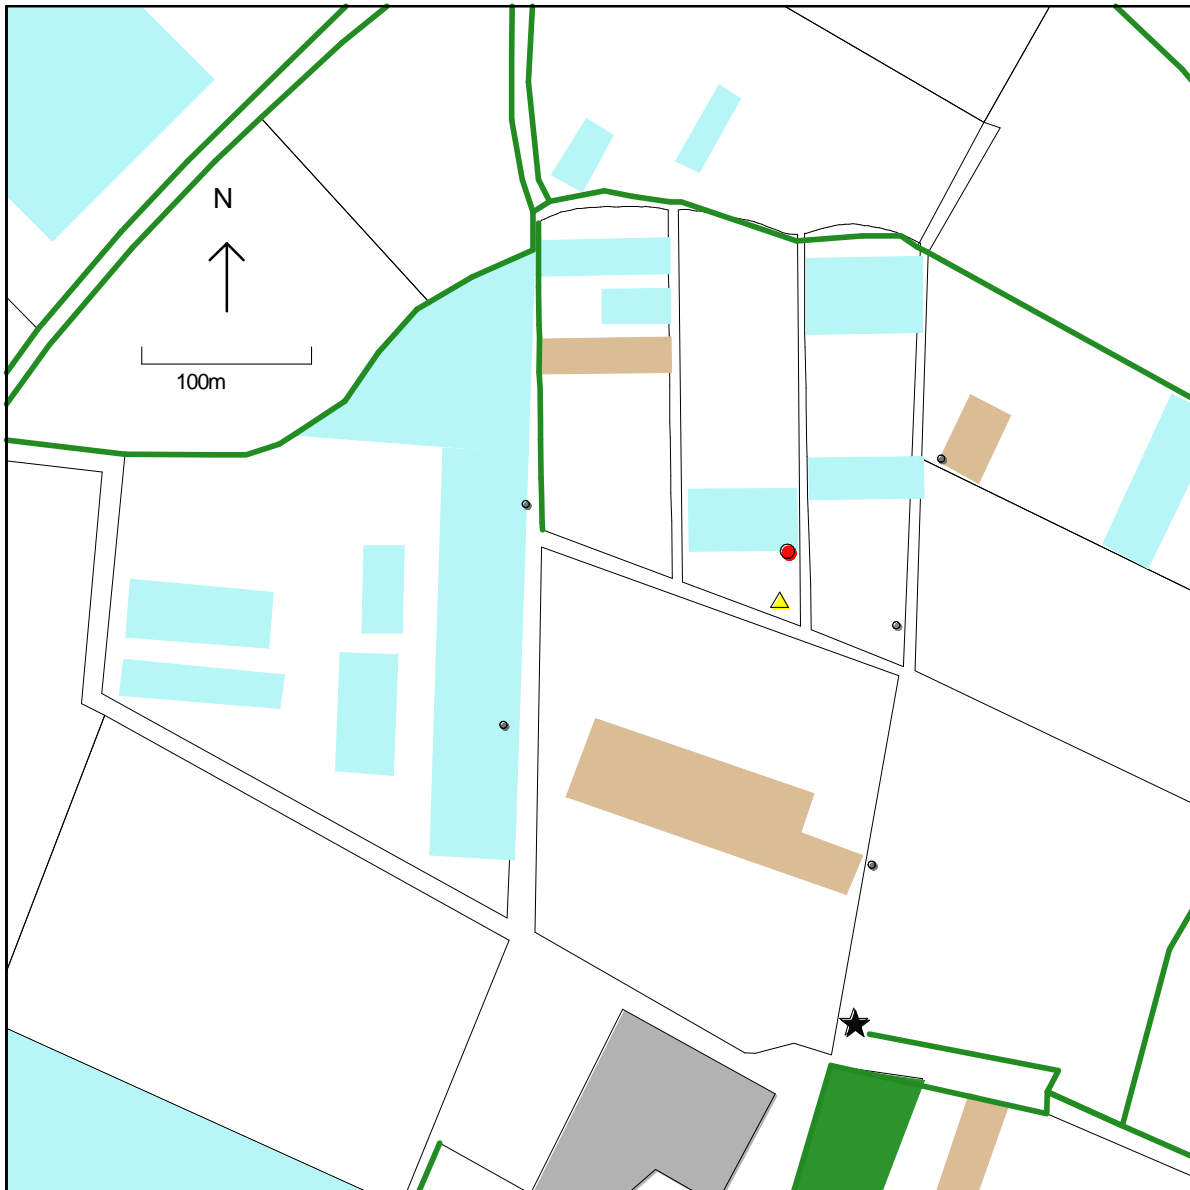

- Key**
- Field boundaries
  - Hedgerows and wooded area
  - Patches of crops or flowering plants providing nectar and pollen
  - Tall maize crop could cause some obstruction of radar signals
  - Buildings
  - Colony location
  - ★ Radar location
  - 5 meteorological stations
  - ▲ Location of moth light trap and hogweed plants

Supporting Information for:

**PLoS ONE**

The Ontogeny of Bumblebee Flight Trajectories: From Naïve Explorers to Experienced Foragers

**Juliet L. Osborne,\*<sup>1,2</sup> Alan Smith,<sup>2</sup> Suzanne J. Clark,<sup>2</sup> Don R. Reynolds,<sup>3</sup> Mandy C. Barron,<sup>4</sup> Ka S. Lim<sup>2</sup>, Andy M. Reynolds<sup>2</sup>**

<sup>1</sup> Environment & Sustainability Institute, University of Exeter, Penryn Campus, Penryn, Cornwall, TR10 9EZ, UK

<sup>2</sup> Rothamsted Research, Harpenden, Hertfordshire, AL5 2JQ, UK

<sup>3</sup> Natural Resources Institute, University of Greenwich, Chatham, Kent, ME4 4TB, UK

<sup>4</sup> Landcare Research, PO Box 40, Lincoln, 7640, New Zealand

\*Corresponding author: [J.L.Osborne@exeter.ac.uk](mailto:J.L.Osborne@exeter.ac.uk)
