# Supplementary material for: The Ontogeny of Bumblebee Flight Trajectories: From Naïve Explorers to Experienced Foragers
Source: PubMed Central journal article supplement (PMC3827042; doi:10.1371/journal.pone.0078681), 2013-11-12
Supplement: pone.0078681.s004.pdf [file pone.0078681.s004.pdf]

**Supporting Information: Table S1:** Summary data for each tracked bumblebee flight. Group refers to experience as used in statistical analyses. Grey font indicates tracks that were not complete (part) because the bee was not radar-tracked returning home – in these cases, data were only used for average ground speed, quadrant, arc and loop analyses (not distance parameters). # CHP = Convex Hull Polygon, \$ IQR = Interquartile range of bearings, † Evidence of arcs or Turn Back & Look flights (TBL) at the start and end of the flights were recorded visually within 2m of colony entrance and on the radar track within 10m of colony entrance.

| Bee | Track no | Age when tracked (days) | Trip no.   | Group | No. fixes in track | Max displacement (m) | Total distance (m) | Duration (s) | CHP# area (m <sup>2</sup> ) | IQR\$ (deg) | No. quadrants | Mean (±s.e.) step speed for gaps < 15s | no. of gaps < 15s | no. gaps ≥ 15s | no. gaps 1-3 mins | no. gaps > 3 mins | †Visual: TBL/arcs @ start | †Radar: arcs @ start | †Radar: arcs @ end | Approx no. loops | Foraging evidence |
|-----|----------|-------------------------|------------|-------|--------------------|----------------------|--------------------|--------------|-----------------------------|-------------|---------------|----------------------------------------|-------------------|----------------|-------------------|-------------------|---------------------------|----------------------|--------------------|------------------|-------------------|
| Y39 | 302a-b   | 6                       | 1          | 1     | 31                 | 20.9                 | 213.1              | 520          | 280                         | 65.2        | 3             | 1.72 ± 0.3                             | 26                | 4              | 1                 | 1                 | Y                         | Y                    | Y                  | 5                |                   |
| Y59 | 305      | 3                       | 1          | 1     | 30                 | 23                   | 242.6              | 875          | 332.1                       | 70.2        | 3             | 1.39 ± 0.3                             | 22                | 7              | 2                 | 1                 | Y                         | Y                    | ?                  | 3                |                   |
| Y72 | 311      | 2.5                     | 1          | 1     | 21                 | 22.8                 | 145                | 123          | 268.1                       | 42.7        | 2             | 1.53 ± 0.3                             | 19                | 1              | 0                 | 0                 | Y                         | N                    | N                  | 1                |                   |
| Y50 | 314      | 7                       | 1          | 1     | 124                | 179.4                | 1510.1             | 3360         | 13807                       | 94.3        | 4             | 2.68 ± 0.2                             | 112               | 11             | 5                 | 1                 | Y                         | Y                    | Y                  | 5                |                   |
| Y56 | 315      | 6                       | 1          | 1     | 29                 | 44.5                 | 307.4              | 304          | 521.5                       | 83.0        | 4             | 2.04 ± 0.3                             | 25                | 3              | 1                 | 0                 | N                         | Y                    | N                  | 4                |                   |
| W2  | 318      | 0.5                     | 1          | 1     | 52                 | 44.3                 | 416.3              | 211          | 1428                        | 109.8       | 4             | 2.19 ± 0.3                             | 51                | 0              | 0                 | 0                 | Y                         | Y                    | Y                  | 3                |                   |
| G42 | 319      | 10                      | 1          | 1     | 84                 | 89.6                 | 1083.8             | 890          | 9964                        | 176.7       | 4             | 3.23 ± 0.3                             | 76                | 7              | 3                 | 1                 | Y                         | Y                    | Y                  | 6                |                   |
| R28 | 320      | 2                       | 1          | 1     | 42                 | 33                   | 287.6              | 184          | 401                         | 153.0       | 4             | 1.96 ± 0.2                             | 40                | 1              | 0                 | 0                 | Y                         | Y                    | Y                  | 3                |                   |
| Y66 | 325      | 7                       | 1          | 1     | 91                 | 70.5                 | 777.9              | 572          | 5081                        | 92.6        | 4             | 2.2 ± 0.2                              | 85                | 5              | 0                 | 0                 | Y                         | Y                    | Y                  | 6                |                   |
| R30 | 330      | <1                      | 1          | 1     | 38                 | 32.4                 | 314.4              | 372          | 816                         | 102.0       | 4             | 2.28 ± 0.4                             | 33                | 4              | 2                 | 0                 | Y                         | Y                    | Y                  | 4                |                   |
| W37 | 339      | 2                       | 1          | 1     | 46                 | 39.3                 | 434.2              | 172          | 1683                        | 84.1        | 4             | 2.76 ± 0.3                             | 44                | 0              | 0                 | 0                 | Y                         | Y                    | N                  | 3                |                   |
| W33 | 340      | 3                       | 1          | 1     | 9                  | 5.5                  | 34                 | 138          | 32                          | 136.1       | 2             | 1.09 ± 0.4                             | 5                 | 3              | 0                 | 0                 | Y                         | ?                    | ?                  | 1                |                   |
| W38 | 341      | 2                       | 1          | 1     | 22                 | 5.7                  | 117.7              | 156          | 50                          | 81.2        | 4             | 1.6 ± 0.3                              | 17                | 4              | 0                 | 0                 | Y                         | Y                    | Y                  | 0                |                   |
| R36 | 341ex    | <1                      | 1          | 1     | 46                 | 25.6                 | 268.2              | 340          | 513.5                       | 149.0       | 4             | 1.23 ± 0.2                             | 41                | 4              | 1                 | 0                 | Y                         | Y                    | Y                  | 4                |                   |
| G53 | 313      | 9                       | 1 (part)   | 1     | 22                 | *                    | *                  | *            | *                           | *           | 4             | 2.57 ± 0.5                             | 18                | 3              | 0                 | 0                 | Y                         | Y                    | *                  | 2                |                   |
| W8  | 316      | <1                      | 1 (part)   | 1     | 29                 | *                    | *                  | *            | *                           | *           | 2             | 0.97 ± 0.2                             | 21                | 3              | 1                 | 0                 | Y                         | Y                    | *                  | 2                |                   |
| Y78 | 323      | 3.5                     | 1 (part)   | 1     | 54                 | *                    | *                  | *            | *                           | *           | 3             | 2.49 ± 0.4                             | 47                | 6              | 1                 | 3                 | Y                         | Y                    | *                  | 2                |                   |
| W39 | 347a-d   | 4                       | 1 (part)   | 1     | 127                | *                    | *                  | *            | *                           | *           | 4             | 3.00 ± 0.2                             | 99                | 25             | 4                 | 7                 | Y                         | Y                    | *                  | 5                |                   |
| Y47 | 304      | 5                       | 2          | 2     | 29                 | 354.7                | 946.7              | 776          | 27344                       | 129.7       | 4             | 3.92 ± 0.8                             | 19                | 9              | 2                 | 1                 | Y                         | N                    | Y                  | 3                |                   |
| Y67 | 310      | 3.5                     | 2          | 2     | 11                 | 23.8                 | 91.7               | 208          | 189                         | 100.1       | 2             | 2.19 ± 0.9                             | 9                 | 1              | 1                 | 0                 | N                         | Y                    | ?                  | 1                |                   |
| R3  | 317      | <1                      | 3          | 2     | 60                 | 340.8                | 1371.7             | 5074         | 53431                       | 195.1       | 2             | 5.74 ± 0.3                             | 54                | 5              | 1                 | 3                 | N                         | N                    | N                  | 2                |                   |
| W19 | 335a-b   | 3                       | 3          | 2     | 29                 | 63.5                 | 429.1              | 3531         | 2546                        | 110.6       | 4             | 3.87 ± 0.6                             | 22                | 6              | 2                 | 3                 | N                         | N                    | Y                  | 4                |                   |
| W21 | 336      | 3                       | 2          | 2     | 9                  | 18.1                 | 72.7               | 315          | 119.5                       | 132.7       | 3             | 1.8 ± 0.3                              | 6                 | 2              | 1                 | 1                 | Y                         | N                    | N                  | 1                |                   |
| W35 | 348a-b   | 5                       | 2          | 2     | 61                 | 276.3                | 1162.5             | 1228         | 25871                       | 186.3       | 4             | 3.32 ± 0.4                             | 49                | 11             | 1                 | 1                 | Y                         | Y                    | ?                  | 3                | hogweed foraging  |
| Y58 | 312ab    | 5                       | 2 (part)   | 2     | 18                 | *                    | *                  | *            | *                           | *           | 4             | 2.85 ± 0.7                             | 17                | 0              | 0                 | 0                 | Y                         | Y                    | *                  | 3                |                   |
| W7  | 329      | 3                       | 2 (part)   | 2     | 11                 | *                    | *                  | *            | *                           | *           | 2             | 1.61 ± 0.5                             | 8                 | 2              | 0                 | 1                 | Y                         | Y                    | *                  | 1                |                   |
| W12 | 326      | 2.5                     | 3 (part)   | 2     | 14                 | *                    | *                  | *            | *                           | *           | 1             | 3.63 ± 0.4                             | 12                | 1              | 0                 | 0                 | N                         | N                    | *                  | 0                |                   |
| Y12 | 301+3    | 6                       | 7          | 3     | 33                 | 301.6                | 674                | 1095         | 13570                       | 15.3        | 1             | 5.55 ± 0.4                             | 28                | 4              | 0                 | 1                 | Y                         | N                    | N                  | 1                | lupin pollen      |
| G47 | 322      | 11                      | ~ 18       | 3     | 26                 | 295.9                | 667.4              | 6703         | 10639                       | 14.5        | 1             | 5.15 ± 0.7                             | 21                | 4              | 1                 | 1                 | N                         | N                    | N                  | 1                |                   |
| W3  | 327a-b   | 3                       | ~ 22       | 3     | 16                 | 68.5                 | 278.1              | 1380         | 1220                        | 54.6        | 1             | 3.96 ± 0.7                             | 12                | 3              | 1                 | 2                 | N                         | N                    | N                  | 2                |                   |
| Y1  | 338a-c   | 15                      | ~ 66       | 3     | 50                 | 358.8                | 1355.6             | 7380         | 20466                       | 11.2        | 3             | 4.83 ± 0.4                             | 44                | 5              | 0                 | 2                 | N                         | N                    | N                  | 3                | poppy pollen      |
| W38 | 343a-b   | 3                       | 10         | 3     | 71                 | 284.2                | 1102               | 1587         | 27840                       | 68.9        | 2             | 3.3 ± 0.4                              | 48                | 22             | 8                 | 1                 | N                         | N                    | N                  | 2                | hogweed foraging  |
| Y17 | 344      | 16                      | ~ 81       | 3     | 28                 | 285.1                | 714.5              | 424          | 14370                       | 79.1        | 2             | 4.16 ± 0.5                             | 20                | 7              | 3                 | 0                 | N                         | N                    | N                  | 1                |                   |
| W37 | 345a-b   | 3                       | ~ 16       | 3     | 29                 | 235.4                | 610.2              | 3237         | 10447                       | 21.4        | 2             | 5.22 ± 0.1                             | 23                | 5              | 0                 | 1                 | N                         | N                    | N                  | 1                |                   |
| Y20 | 346a-b   | 17                      | ~ 125      | 3     | 40                 | 483.4                | 1268.4             | 4673         | 33136                       | 78.8        | 3             | 3.51 ± 0.3                             | 32                | 7              | 0                 | 1                 | N                         | N                    | N                  | 2                | field bean pollen |
| Y46 | 309      | 6                       | ~10 (part) | 3     | 26                 | *                    | *                  | *            | *                           | *           | 1             | 4.06 ± 0.3                             | 22                | 3              | 2                 | 1                 | N                         | N                    | *                  | 0                |                   |
| Y59 | 321      | 7                       | ~43 (part) | 3     | 32                 | *                    | *                  | *            | *                           | *           | 1             | 3.97 ± 0.2                             | 30                | 1              | 0                 | 0                 | N                         | N                    | *                  | 0                |                   |
| Y61 | 328      | 9                       | ~97 (part) | 3     | 8                  | *                    | *                  | *            | *                           | *           | 1             | 7.11 ± 0.2                             | 4                 | 3              | 0                 | 1                 | N                         | N                    | *                  | 0                |                   |

Supporting Information for:

**PLoS ONE**

The Ontogeny of Bumblebee Flight Trajectories: From Naïve Explorers to Experienced Foragers

**Juliet L. Osborne,\*<sup>1,2</sup> Alan Smith,<sup>2</sup> Suzanne J. Clark,<sup>2</sup> Don R. Reynolds,<sup>3</sup> Mandy C. Barron,<sup>4</sup> Ka S. Lim<sup>2</sup>, Andy M. Reynolds<sup>2</sup>**

<sup>1</sup>Environment & Sustainability Institute, University of Exeter, Penryn Campus, Penryn, Cornwall, TR10 9EZ, UK

<sup>2</sup>Rothamsted Research, Harpenden, Hertfordshire, AL5 2JQ, UK

<sup>3</sup>Natural Resources Institute, University of Greenwich, Chatham, Kent, ME4 4TB, UK

<sup>4</sup>Landcare Research, PO Box 40, Lincoln, 7640, New Zealand

\*Corresponding author: [J.L.Osborne@exeter.ac.uk](mailto:J.L.Osborne@exeter.ac.uk)
